# Supplementary material for: Sources of Resistance to Common Bacterial Blight and Charcoal Rot Disease for the Production of Mesoamerican Common Beans in the Southern United States
Source: MDPI journal article supplement (doi:10.3390/plants10050998), 2021-05-17
Supplement: s1 [file s1]

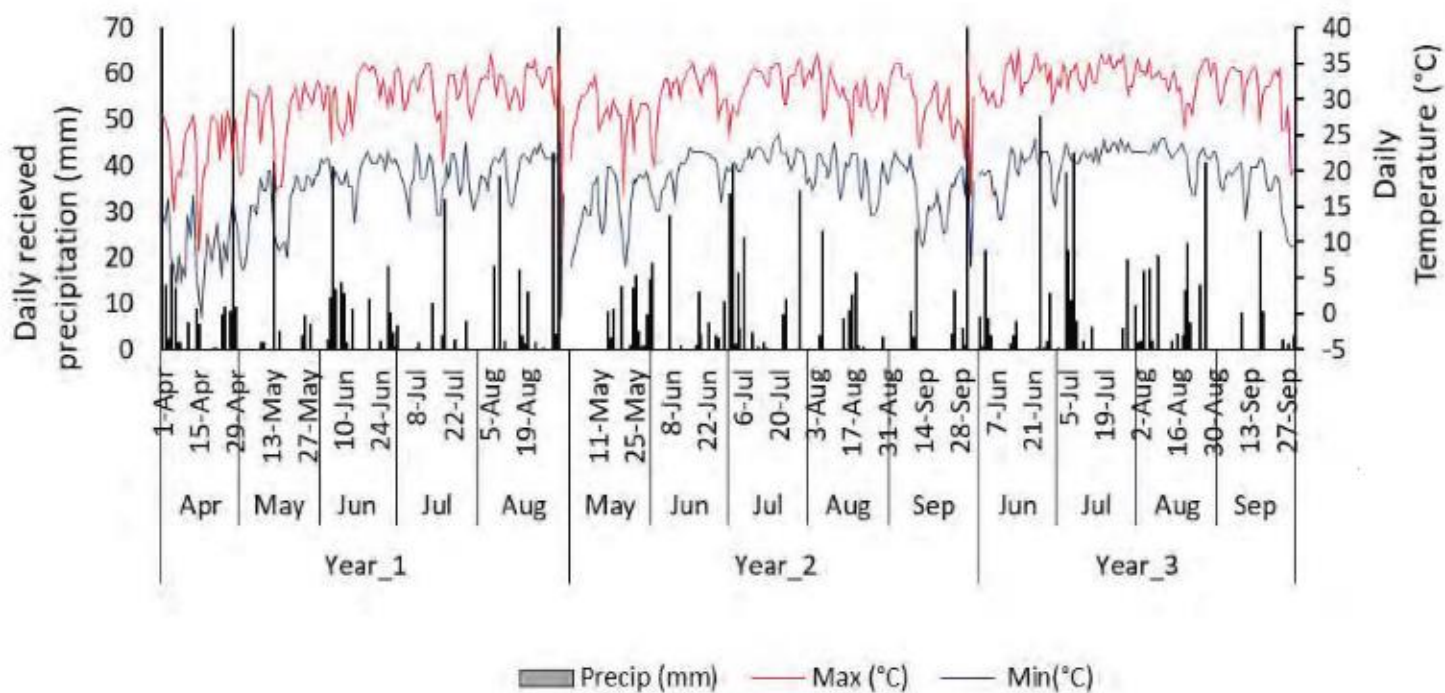

| Weather Parameter          | Year_1      | Year_2       | Year_3        |
|----------------------------|-------------|--------------|---------------|
| Total Precipitation (mm)   | 592.82      | 489          | 483.63        |
| Average Temperature (°C)   | 16.77-29.01 | 18.68 -30.39 | 20.65 - 32.53 |
| Max Temperature Range (°C) | 8.89-36.11  | 16.72 -36.11 | 19.39 - 36.72 |
| Min Temperature Range(°C)  | -0.5 -23.89 | 6.72 -25     | 9.39 - 24.39  |
